# Supplementary material for: A point‐to‐point protein–protein interaction assay reveals the signaling interplays among plant hormones and environmental cues
Source: PubMed Central journal article supplement — Plant Direct. 2020 May 25;4(5):e00228. doi: 10.1002/pld3.228 (PMC7247280; doi:10.1002/pld3.228), 2020-05-25
Supplement: PLD3-4-e00228-s001.pdf [file PLD3-4-e00228-s001.pdf]

1 **Supplemental information**

2 **Figure S1.** Screening PPIs between JAZs and key components in ABA signaling

3 pathways.

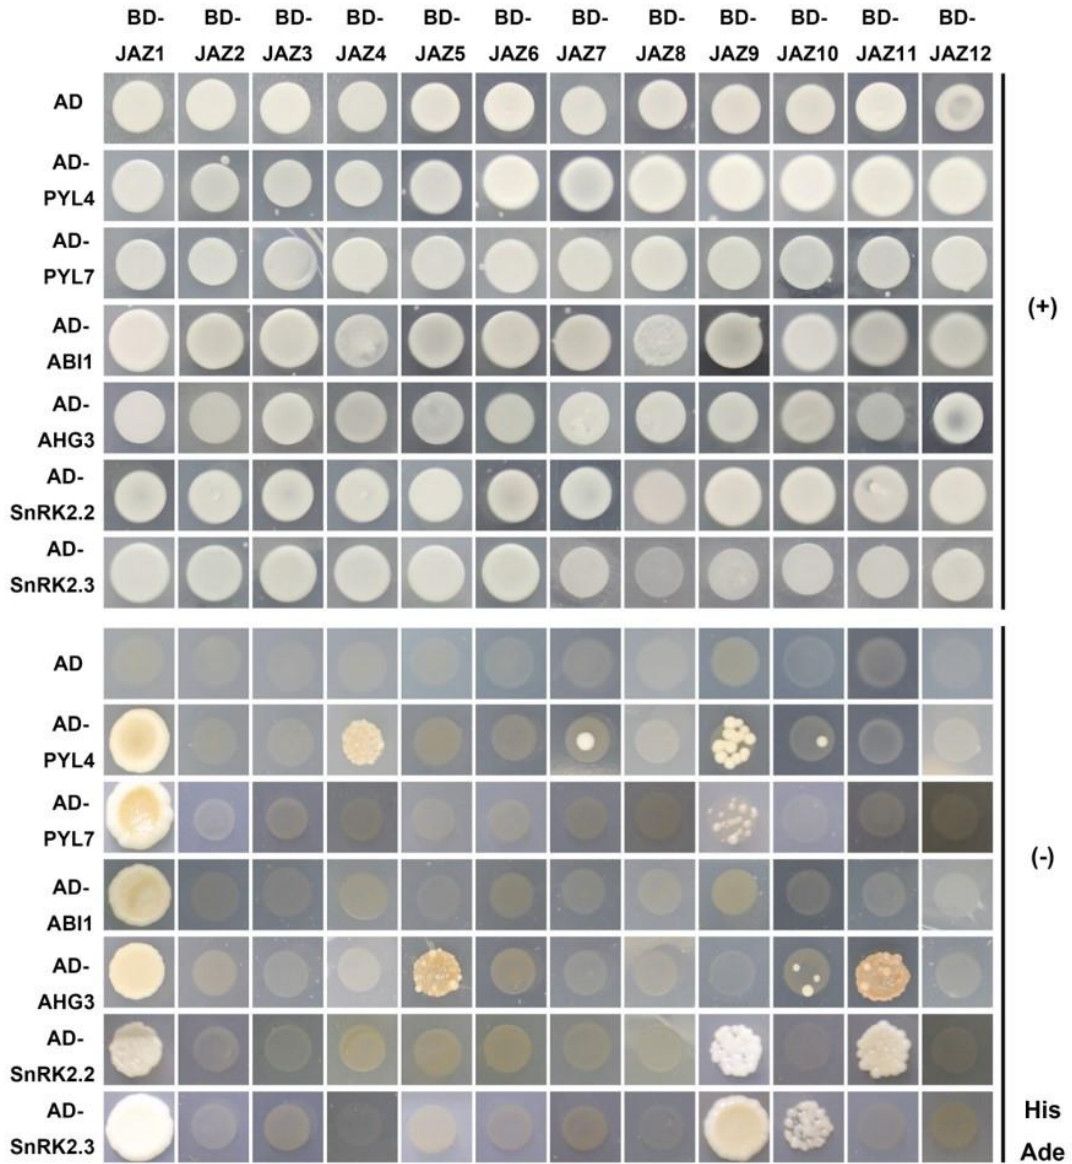

4
