# Supplementary material for: A point‐to‐point protein–protein interaction assay reveals the signaling interplays among plant hormones and environmental cues
Source: PubMed Central journal article supplement — Plant Direct. 2020 May 25;4(5):e00228. doi: 10.1002/pld3.228 (PMC7247280; doi:10.1002/pld3.228), 2020-05-25
Supplement: PLD3-4-e00228-s002.pdf [file PLD3-4-e00228-s002.pdf]

| Category    | Gene ID   | Gene  | Forward Primer (5'-3')                    | Rreverse Primer (5'-3')                   |
|-------------|-----------|-------|-------------------------------------------|-------------------------------------------|
| Light&clock | AT1G04400 | CRY2  | TCAGCAGTCGAAGAGCAAGA<br>TGGACAAAAAGACTAT  | TTAGCGTGTGAAGAGCTTTG<br>CAACCATTTTTTCCCA  |
| Light&clock | AT1G09530 | PIF3  | TCAGCAGTCGAAGAGCCCTC<br>TGTTTGAGCTTTTCAG  | TTAGCGTGTGAAGAGCCGAC<br>GATCCACAAAAGTAT   |
| Light&clock | AT1G09570 | PHYA  | TCAGCAGTCGAAGAGCTCAG<br>GCTCTAGGCCGACTCA  | TTAGCGTGTGAAGAGCCTTG<br>TTTGCTGCAGCGAGTT  |
| Light&clock | AT1G22770 | GI    | TCAGCAGTCGAAGAGCGCTA<br>GTTTCATCTTCATCTGA | TTAGCGTGTGAAGAGCTTGG<br>GACAAGGATATAGTAC  |
| Light&clock | AT2G20180 | PIL5  | TCAGCAGTCGAAGAGCCATC<br>ATTTTGTCCTGACTT   | TTAGCGTGTGAAGAGCACCT<br>GTTGTGTGGTTTCCGT  |
| Light&clock | AT2G25930 | ELF3  | TCAGCAGTCGAAGAGCAAGA<br>GAGGGAAAGATGAGGA  | TTAGCGTGTGAAGAGCAGGC<br>TTAGAGGAGTCATAGC  |
| Light&clock | AT2G40080 | ELF4  | TCAGCAGTCGAAGAGCAAGA<br>GGAACGGCGAGACGAA  | TTAGCGTGTGAAGAGCAGCT<br>CTAGTTCCGGCAGCAC  |
| Light&clock | AT2G43010 | PIF4  | TCAGCAGTCGAAGAGCGAAC<br>ACCAAGGTTGGAGTTT  | TTAGCGTGTGAAGAGCGTGG<br>TCCAAACGAGAACCGT  |
| Light&clock | AT2G46830 | CCA1  | TCAGCAGTCGAAGAGCGAGA<br>CAAATTCGTCTGGAGA  | TTAGCGTGTGAAGAGCTGTG<br>GAAGCTTGAGTTTCCA  |
| Light&clock | AT3G09150 | HY2   | TCAGCAGTCGAAGAGCGCTT<br>TATCAATGGAGTTTGG  | TTAGCGTGTGAAGAGCGCCG<br>ATAAATTGTCCTGTTA  |
| Light&clock | AT3G45780 | PHOT1 | TCAGCAGTCGAAGAGCGAAC<br>CAACAGAAAAACCATC  | TTAGCGTGTGAAGAGCAAAA<br>ACATTTGTTTGCAGAT  |
| Light&clock | AT3G47500 | CDF3  | TCAGCAGTCGAAGAGCATGA<br>TGGAGACTAGAGATCC  | TTAGCGTGTGAAGAGCAATC<br>TGTTTCATGGAAATTGT |
| Light&clock | AT3G59060 | PIL6  | TCAGCAGTCGAAGAGCGAAC<br>AAGTGTTTGCTGATTG  | TTAGCGTGTGAAGAGCGCCT<br>ATTTTACCCATATGAA  |
| Light&clock | AT3G62090 | PIL2  | TCAGCAGTCGAAGAGCATGT<br>TCTTACCAACCGATTA  | TTAGCGTGTGAAGAGCTCTG<br>TTAGTTTTCCCTTGATT |
| Light&clock | AT4G08920 | CRY1  | TCAGCAGTCGAAGAGCTCTG<br>GTTCTGTATCTGGTTG  | TTAGCGTGTGAAGAGCCCCG<br>GTTTGTGAAAGCCGTC  |
| Light&clock | AT4G17640 | CKB2  | TCAGCAGTCGAAGAGCTATA<br>GGGAGAGAGGTATGGT  | TTAGCGTGTGAAGAGCCGGC<br>TTGTGTAGCTTGAACC  |
| Light&clock | AT4G34530 | CIB1  | TCAGCAGTCGAAGAGCAATG<br>GAGCTATAGGAGGTGA  | TTAGCGTGTGAAGAGCAACT<br>CCTAAATTGCCATAGA  |
| Light&clock | AT5G20570 | RBX1  | TCAGCAGTCGAAGAGCGCGA<br>CTCTAGACTCCGACGT  | TTAGCGTGTGAAGAGCGTGA<br>CCATATTTCTGAAACT  |
| Light&clock | AT5G39660 | CDF2  | TCAGCAGTCGAAGAGCGCTG<br>ATCCGGCGATTAAGCT  | TTAGCGTGTGAAGAGCTGAG<br>CTCTCATGGAAGTTTG  |
| Light&clock | AT5G57660 | COL5  | TCAGCAGTCGAAGAGCGGAT<br>TCGGCTTAGAGAGTAT  | TTAGCGTGTGAAGAGCGAAC<br>GTTGGTACGACACCGT  |
| Light&clock | AT5G61380 | TOC1  | TCAGCAGTCGAAGAGCGATT<br>TGAACGGTGAGTGTA   | TTAGCGTGTGAAGAGCAGTT<br>CCCAAAGCATCATCCT  |
| Light&clock | AT5G62430 | CDF1  | TCAGCAGTCGAAGAGCCTGG<br>AACTAAAGATCCTGC   | TTAGCGTGTGAAGAGCCATC<br>TGCTCATGGAATTGA   |
| Light&clock | AT5G67380 | CKA1  | TCAGCAGTCGAAGAGCATAG<br>ATACGCTTTTCTTCTT  | TTAGCGTGTGAAGAGCTTGA<br>CTTCTCATTCTGCTGG  |

|               |           |       |                                          |                                           |
|---------------|-----------|-------|------------------------------------------|-------------------------------------------|
| Light&clock   | At3g46640 | LUX   | TCAGCAGTCGAAGAGCGGAG<br>AGGAAGTACAAATGAG | TTAGCGTGTGAAGAGCCATG<br>ATACTTTGTATGATCC  |
| Light&clock   | At3g13670 | PPK1  | TCAGCAGTCGAAGAGCCCGG<br>AGCTTCGCCGTGGAGT | TTAGCGTGTGAAGAGCAGAT<br>ACAGTTCGGCCATAGC  |
| Light&clock   | At5g18190 | PPK2  | TCAGCAGTCGAAGAGCCCGG<br>AGTTAAGAAGTGGAGC | TTAGCGTGTGAAGAGCGCAA<br>ACTGTCTCCCAAAGC   |
| Light&clock   | At3g03940 | PPK3  | TCAGCAGTCGAAGAGCCCGG<br>AGTTAAGAAGTGGAGC | TTAGCGTGTGAAGAGCGCAA<br>ACTGTCCGACCATAGC  |
| Light&clock   | At2g25760 | PPK4  | TCAGCAGTCGAAGAGCCCTG<br>AGCTGCGTAGCAACGC | TTAGCGTGTGAAGAGCTGAC<br>ACAGTTCGACCATAAC  |
| Light&clock   | At3g44450 | BIC1  | TCAGCAGTCGAAGAGCAAGA<br>ACACCAATTTGCCTGA | TTAGCGTGTGAAGAGCACAA<br>GAACTCTCAACTCGAA  |
| Abscisic acid | AT2G26040 | PYL2  | TCAGCAGTCGAAGAGCAGCT<br>CATCCCCGGCCGTGAA | TTAGCGTGTGAAGAGCTTCA<br>TCATCATGCATAGGTG  |
| Abscisic acid | AT1G73000 | PYL3  | TCAGCAGTCGAAGAGCAATC<br>TTGCTCCAATCCATGA | TTAGCGTGTGAAGAGCGGTC<br>GGAGAAGCCGTGGAAA  |
| Abscisic acid | AT2G40330 | PYL6  | TCAGCAGTCGAAGAGCCCAA<br>CGTCGATACAGTTTCA | TTAGCGTGTGAAGAGCCGAG<br>AATTTAGAAGTGTCT   |
| Abscisic acid | AT5G45860 | PYL11 | TCAGCAGTCGAAGAGCGAAA<br>CTTCTCAAAAATATCA | TTAGCGTGTGAAGAGCCAAC<br>TTAGATGAGCCACCC   |
| Abscisic acid | AT5G59220 | HAI1  | TCAGCAGTCGAAGAGCGCTG<br>AGATTTGTTACGAGAA | TTAGCGTGTGAAGAGCCGTG<br>TCTCGTCGTAGATCAA  |
| Abscisic acid | AT2G29380 | HAI3  | TCAGCAGTCGAAGAGCGCCG<br>AGATATGTTACGAAGT | TTAGCGTGTGAAGAGCTCTT<br>CTGAGATCAATCACAA  |
| Abscisic acid | AT1G49720 | ABF1  | TCAGCAGTCGAAGAGCGGTA<br>CTCACATTGATATCAA | TTAGCGTGTGAAGAGCCCTT<br>CTTACCACGGACCGGT  |
| Abscisic acid | AT1G45249 | ABF2  | TCAGCAGTCGAAGAGCGATG<br>GTAGTATGAATTTGGG | TTAGCGTGTGAAGAGCCCAA<br>GGTCCCGACTCTGTCC  |
| Abscisic acid | AT4G34000 | ABF3  | TCAGCAGTCGAAGAGCGGGT<br>CTAGATTAACCTTCAA | TTAGCGTGTGAAGAGCCAG<br>GGACCCGTCAATGTCC   |
| Abscisic acid | AT1G17550 | HAB2  | TCAGCAGTCGAAGAGCGAAG<br>AGATTTACCTGCAGT  | TTAGCGTGTGAAGAGCAGAT<br>CTGGTCTTGAACCTTC  |
| Abscisic acid | AT4G17870 | PYR1  | GGAGGCCAGTGAATTCCTT<br>CGGAGTTAACACCAG   | CACCCGGGTGGAATTCCTGTC<br>ACCTGAGAACCACTTC |
| Abscisic acid | AT5G46790 | PYL1  | GGAGGCCAGTGAATTCGCGA<br>ATTCAGAGTCCTCCTC | CACCCGGGTGGAATTCCTA<br>ACCTGAGAAGAGTTG    |
| Abscisic acid | AT2G38310 | PYL4  | GGAGGCCAGTGAATTCCTTG<br>CCGTTACCGTCCTTC  | CACCCGGGTGGAATTCAGAG<br>GACATCTTCTTCTTGC  |
| Abscisic acid | AT5G05440 | PYL5  | GGAGGCCAGTGAATTCAGGT<br>CACCGGTGCAACTCC  | CACCCGGGTGGAATTCCTGTC<br>CGGTTGGTACTTCGAG |
| Abscisic acid | AT4G01026 | PYL7  | GGAGGCCAGTGAATTCGAGA<br>TGATCGGAGGAGACG  | CACCCGGGTGGAATTCAGAG<br>TTGGTTTCTGTATG    |
| Abscisic acid | AT1G01360 | PYL9  | GGAGGCCAGTGAATTCATGG<br>ACGGCGTTGAAGGCGG | CACCCGGGTGGAATTCCTGA<br>GTAATGTCCTGAGAAG  |
| Abscisic acid | AT4G26080 | ABI1  | GGAGGCCAGTGAATTCGAGG<br>AAGTATCTCCGGCG   | CACCCGGGTGGAATTCGTTT<br>AAGGGTTTGCTCTTG   |
| Abscisic acid | AT5G57050 | ABI2  | GGAGGCCAGTGAATTCGACG<br>AAGTTTCTCCTGCAG  | CACCCGGGTGGAATTCATTC<br>AAGGATTTGCTCTTG   |

|                |           |       |                                          |                                          |
|----------------|-----------|-------|------------------------------------------|------------------------------------------|
| Abscisic acid  | AT1G72770 | HAB1  | GGAGGCCAGTGAATTCGAGG<br>AGATGACTCCCGCAG  | CACCCGGGTGGAATTCGGTT<br>CTGGTCTTGAACTTTC |
| Abscisic acid  | AT3G11410 | AHG3  | GGAGGCCAGTGAATTCGCTG<br>GGATTTGTTGCGGTG  | CACCCGGGTGGAATTCAGAC<br>GACGCTTGATTATTC  |
| Abscisic acid  | AT3G56850 | AREB3 | GGAGGCCAGTGAATTCGATT<br>CTCAGAGGGGTATTG  | CACCCGGGTGGAATTCGAAA<br>GGAGCCGAGCTTGTC  |
| Abscisic acid  | AT3G50500 | SNRK2 | TCAGCAGTCGAAGAGCGATC<br>CGGCGACTAATTCACC | TTAGCGTGTGAAGAGCGAGA<br>GCATAAACTATCTCTC |
| Abscisic acid  | AT5G66880 | SNRK2 | TCAGCAGTCGAAGAGCGATC<br>GAGCTCCGGTGACCAC | TTAGCGTGTGAAGAGCGAGA<br>GCGTAAACTATCTCTC |
| Abscisic acid  | AT1G10940 | SNRK2 | TCAGCAGTCGAAGAGCGACA<br>AGTACGAGCTGGTGAA | TTAGCGTGTGAAGAGCACTT<br>ATTCTCACTTCTCCAC |
| Abscisic acid  | AT4G33950 | SNRK2 | TCAGCAGTCGAAGAGCGATC<br>GACCAGCAGTGAGTGG | TTAGCGTGTGAAGAGCCATT<br>GCGTACACAATCTCTC |
| Abscisic acid  | AT1G12480 | SLAC1 | TCAGCAGTCGAAGAGCGAGA<br>GGAAACAGTCAAATGC | TTAGCGTGTGAAGAGCGTGA<br>TGCGACTCTCCTCTG  |
| Abscisic acid  | AT3G57530 | CPK32 | TCAGCAGTCGAAGAGCGGTA<br>ATTGTTGCGGAACAGC | TTAGCGTGTGAAGAGCTCTT<br>GTATCACCATTGACCT |
| Salicylic acid | AT1G05560 | UGT1  | TCAGCAGTCGAAGAGCGCGC<br>CACCGCATTTTCTACT | TTAGCGTGTGAAGAGCCTTT<br>ACTTTTACCTCCTCTG |
| Salicylic acid | AT1G21270 | WAK2  | TCAGCAGTCGAAGAGCAAGG<br>TACAGGAGGGTTTGT  | TTAGCGTGTGAAGAGCACGG<br>CCAGCTTCAATGTCCA |
| Salicylic acid | AT2G43820 | SAGT1 | TCAGCAGTCGAAGAGCGAGC<br>ATAAGAGAGGACATGT | TTAGCGTGTGAAGAGCTTTG<br>CTCTGAACCCTTGATA |
| Salicylic acid | AT3G52430 | PAD4  | TCAGCAGTCGAAGAGCGACG<br>ATTGTCGATTCGAGAC | TTAGCGTGTGAAGAGCAGTC<br>TCCATTGCGTCACTCT |
| Salicylic acid | AT1G64280 | NPR1  | TCAGCAGTCGAAGAGCGACA<br>CCACCATTGATGGATT | TTAGCGTGTGAAGAGCCCGA<br>CGACGATGAGAGAGTT |
| Salicylic acid | AT5G06950 | TGA2  | TCAGCAGTCGAAGAGCGCTG<br>ATACCAGTCCGAGAAC | TTAGCGTGTGAAGAGCCTCT<br>CTGGGTCGAGCAAGCC |
| Salicylic acid | AT1G22070 | TGA3  | TCAGCAGTCGAAGAGCGAGA<br>TGATGAGCTCTTCTTC | TTAGCGTGTGAAGAGCAGTG<br>TGTTCTCGTGGACGAG |
| Salicylic acid | AT5G06960 | TGA5  | TCAGCAGTCGAAGAGCGGAG<br>ATACTAGTCCAAGAAC | TTAGCGTGTGAAGAGCCTCT<br>CTTGGTCTGGCAAGCC |
| Jasmonate      | AT4G28910 | NINJA | TCAGCAGTCGAAGAGCGACG<br>ATGATAATGGGCTCGA | TTAGCGTGTGAAGAGCGGTG<br>TGAGCTGACGCTGCAG |
| Jasmonate      | AT1G32640 | MYC2  | TCAGCAGTCGAAGAGCACTG<br>ATTACCGGCTACAACC | TTAGCGTGTGAAGAGCACCG<br>ATTTTTGAAATCAAAC |
| Jasmonate      | AT5G46760 | MYC3  | TCAGCAGTCGAAGAGCAACG<br>GCACAACATCATCAAT | TTAGCGTGTGAAGAGCATAG<br>TTTTCTCCGACTTTCG |
| Jasmonate      | AT4G17880 | MYC4  | TCAGCAGTCGAAGAGCTCTC<br>CGACGAATGTTCAAGT | TTAGCGTGTGAAGAGCTGGA<br>CATTCTCCAACCTTCT |
| Jasmonate      | AT1G19180 | JAZ1  | TCAGCAGTCGAAGAGCTCGA<br>GTTCTATGGAATGTTC | TTAGCGTGTGAAGAGCTATT<br>TCAGCTGCTAAACCG  |
| Jasmonate      | AT1G74950 | JAZ2  | TCAGCAGTCGAAGAGCTCGA<br>GTTTTTCTGCCGAGTG | TTAGCGTGTGAAGAGCCCGT<br>GAACTGAGCCAAGCT  |
| Jasmonate      | AT3G17860 | JAZ3  | TCAGCAGTCGAAGAGCGAGA<br>GAGATTTTCTCGGGTT | TTAGCGTGTGAAGAGCGGTT<br>GCAGAGCTGAGAG    |

|                 |           |       |                                           |                                          |
|-----------------|-----------|-------|-------------------------------------------|------------------------------------------|
| Jasmonate       | AT1G48500 | JAZ4  | TCAGCAGTCGAAGAGCGAGA<br>GAGATTTTCTCGGGTT  | TTAGCGTGTGAAGAGCGTGC<br>AGATGATGAGCTGG   |
| Jasmonate       | AT1G17380 | JAZ5  | TCAGCAGTCGAAGAGCTCGT<br>CGAGCAATGAAAATGC  | TTAGCGTGTGAAGAGCTAGC<br>CTTAGATCGAGATCT  |
| Jasmonate       | AT1G72450 | JAZ6  | TCAGCAGTCGAAGAGCTCAA<br>CGGGACAAGCGC      | TTAGCGTGTGAAGAGCAAGC<br>TTGAGTTCAAGGTTT  |
| Jasmonate       | AT2G34600 | JAZ7  | TCAGCAGTCGAAGAGCATCA<br>TCATCATCAAAAATG   | TTAGCGTGTGAAGAGCTCGG<br>TAACGGTGGTAAGGG  |
| Jasmonate       | AT1G30135 | JAZ8  | TCAGCAGTCGAAGAGCAAGC<br>TACAGCAAAATTGTG   | TTAGCGTGTGAAGAGCTCGT<br>CGTGAATGGTACGGT  |
| Jasmonate       | AT5G13220 | JAZ10 | TCAGCAGTCGAAGAGCTCGA<br>AAGCTACCATAGAACT  | TTAGCGTGTGAAGAGCGGCC<br>GATGTCCGATAGTAA  |
| Jasmonate       | AT3G43440 | JAZ11 | TCAGCAGTCGAAGAGCGCTG<br>AGGTAAACGGAGATTT  | TTAGCGTGTGAAGAGCTGTC<br>ACAATGGGGCTGGTT  |
| Jasmonate       | AT5G20900 | JAZ12 | TCAGCAGTCGAAGAGCACTA<br>AGGTGAAAGATGAGCC  | TTAGCGTGTGAAGAGCAGCA<br>GTTGGAAATTCCTCC  |
| Brassinosteroid | AT1G18400 | BEE1  | TCAGCAGTCGAAGAGCGCAA<br>ATTTTCGAGAATCTTTC | TTAGCGTGTGAAGAGCAAGG<br>GACCATGTTGATAAAT |
| Brassinosteroid | AT2G45400 | BEN1  | TCAGCAGTCGAAGAGCGTGA<br>GAGAAGAACAAGAAGA  | TTAGCGTGTGAAGAGCAAGA<br>AATCCCCTTGCTTGAC |
| Brassinosteroid | AT4G15400 | BIA1  | TCAGCAGTCGAAGAGCGAAG<br>CGAAGCTAGAGGTGAC  | TTAGCGTGTGAAGAGCTGCC<br>ACGACCGGGGATTTA  |
| Brassinosteroid | AT2G30980 | BIL1  | TCAGCAGTCGAAGAGCACTT<br>CGATACCATTGGGGCC  | TTAGCGTGTGAAGAGCGGGT<br>CCAGCTTGAAATGGAA |
| Brassinosteroid | AT1G06390 | BIL2  | TCAGCAGTCGAAGAGCGCCT<br>CATTACCATTGGGGCC  | TTAGCGTGTGAAGAGCACTG<br>TTTTGTAATCCTGTGC |
| Brassinosteroid | AT4G18710 | BIN2  | TCAGCAGTCGAAGAGCGCTG<br>ATGATAAGGAGATGCC  | TTAGCGTGTGAAGAGCAGTT<br>CCAGATTGATTCAAGA |
| Brassinosteroid | AT3G13380 | BRL3  | TCAGCAGTCGAAGAGCAAAC<br>ACAATGGCAGTTCTT   | TTAGCGTGTGAAGAGCAGGC<br>TCCTTATCTCGTGATT |
| Brassinosteroid | AT1G75080 | BZR1  | TCAGCAGTCGAAGAGCACTT<br>CGGATGGAGCTACGTC  | TTAGCGTGTGAAGAGCACCA<br>CGAGCCTTCCCATTTC |
| Brassinosteroid | AT4G33430 | BAK1  | TCAGCAGTCGAAGAGCGAAC<br>GAAGATTAATGATCCC  | TTAGCGTGTGAAGAGCTCTT<br>GGACCCGAGGGGTATT |
| Gibberellin     | AT3G05120 | GID1A | TCAGCAGTCGAAGAGCGCTG<br>CGAGCGATGAAGTTAA  | TTAGCGTGTGAAGAGCACAT<br>TCCGCGTTTACAAACG |
| Gibberellin     | AT3G63010 | GID1B | TCAGCAGTCGAAGAGCGCTG<br>GTGGTAACGAAGTCAA  | TTAGCGTGTGAAGAGCAGGA<br>GTAAGAAGCACAGGAC |
| Gibberellin     | AT5G27320 | GID1C | TCAGCAGTCGAAGAGCGCTG<br>GAAGTGAAGAAGTTAA  | TTAGCGTGTGAAGAGCTTGG<br>CATTCTGCGTTTACAA |
| Gibberellin     | AT1G14920 | GAI   | TCAGCAGTCGAAGAGCAAGA<br>GAGATCATCATCATCA  | TTAGCGTGTGAAGAGCATTG<br>GTGGAGAGTTTCCAAG |
| Gibberellin     | AT1G66350 | RGL1  | TCAGCAGTCGAAGAGCAAGA<br>GAGAGCACACCACCG   | TTAGCGTGTGAAGAGCTTCC<br>ACACGATTGATTCCGC |
| Gibberellin     | AT3G03450 | RGL2  | TCAGCAGTCGAAGAGCAAGA<br>GAGGATACGGAGAAAC  | TTAGCGTGTGAAGAGCGGCG<br>AGTTTCCACGCCGAGG |
| Gibberellin     | AT5G17490 | RGL3  | TCAGCAGTCGAAGAGCAAAC<br>GAAGCCATCAAGAAAC  | TTAGCGTGTGAAGAGCCCGC<br>CGCAACTCCGCCGCTA |

|             |           |       |                                           |                                          |
|-------------|-----------|-------|-------------------------------------------|------------------------------------------|
| Gibberellin | AT4G24210 | SLY1  | TCAGCAGTCGAAGAGCAAGC<br>GCAGTACTACCGACTC  | TTAGCGTGTGAAGAGCTTTG<br>GATTCTGGAAGAGGTC |
| Gibberellin | AT5G48170 | SLY2  | TCAGCAGTCGAAGAGCTCGT<br>CGGAGAAACGTGTAGG  | TTAGCGTGTGAAGAGCGACA<br>ACGTTAACGGGCTTCC |
| Cytokinin   | AT3G21510 | AHP1  | TCAGCAGTCGAAGAGCGATT<br>TGGTTCAGAAGCAGAA  | TTAGCGTGTGAAGAGCAAAT<br>CCGAGTTCGACGGCCG |
| Cytokinin   | AT3G29350 | AHP2  | TCAGCAGTCGAAGAGCGACG<br>CTCTCATTGCTCAGCT  | TTAGCGTGTGAAGAGCGTTA<br>ATATCCACTTGAGGAA |
| Cytokinin   | AT5G39340 | AHP3  | TCAGCAGTCGAAGAGCGACA<br>CACTCATTGCTCAGTT  | TTAGCGTGTGAAGAGCTATA<br>TCCACTTGAGGGATTC |
| Cytokinin   | AT3G16360 | AHP4  | TCAGCAGTCGAAGAGCCAGA<br>GGCAAGTGGCACTCAT  | TTAGCGTGTGAAGAGCCTTG<br>GGCCTACGTGCTGTCT |
| Cytokinin   | AT1G03430 | AHP5  | TCAGCAGTCGAAGAGCAACA<br>CCATCGTCGTTGCTCA  | TTAGCGTGTGAAGAGCATT<br>ATATCCACTTGAGGAA  |
| Cytokinin   | AT1G80100 | AHP6  | TCAGCAGTCGAAGAGCTTGG<br>GGTTGGGTGTGGACCG  | TTAGCGTGTGAAGAGCCATT<br>GGATATCTGACTCCTG |
| Cytokinin   | AT3G16857 | ARR1  | TCAGCAGTCGAAGAGCATGA<br>ATCCGAGTCACGGAAG  | TTAGCGTGTGAAGAGCAACC<br>GGAATGTTATCGATGG |
| Cytokinin   | AT4G16110 | ARR2  | TCAGCAGTCGAAGAGCGTAA<br>ATCCGGGTCACGGAAG  | TTAGCGTGTGAAGAGCGACC<br>TGGATATTATCGATG  |
| Cytokinin   | AT1G59940 | ARR3  | TCAGCAGTCGAAGAGCGCCA<br>AAGACGGTGGCGTTTC  | TTAGCGTGTGAAGAGCAGCT<br>AATCCGGGACTCCTCA |
| Cytokinin   | AT1G10470 | ARR4  | TCAGCAGTCGAAGAGCGCCA<br>GAGACGGTGGTGTTC   | TTAGCGTGTGAAGAGCATCT<br>AATCCGGGACTCCTCA |
| Cytokinin   | AT3G48100 | ARR5  | TCAGCAGTCGAAGAGCGCTG<br>AGGTTTTGCGTCCCGA  | TTAGCGTGTGAAGAGCGATC<br>TTTGCGCGTTTTAGCT |
| Cytokinin   | AT5G62920 | ARR6  | TCAGCAGTCGAAGAGCGCTG<br>AAGTTATGCTACCGAG  | TTAGCGTGTGAAGAGCGATC<br>TTTGCGCGTTTGAGCT |
| Cytokinin   | AT2G41310 | ARR8  | TCAGCAGTCGAAGAGCGTAA<br>TGGAACAGAGTCAAA   | TTAGCGTGTGAAGAGCGACC<br>GAGGTTGTGATATCAT |
| Cytokinin   | AT1G74890 | ARR15 | TCAGCAGTCGAAGAGCGCTC<br>TCAGAGATTTATCTTC  | TTAGCGTGTGAAGAGCACCC<br>CTAGACTCTAATTTGA |
| Cytokinin   | AT2G40670 | ARR16 | TCAGCAGTCGAAGAGCAACA<br>GTTTCAGGAGGTTCTTG | TTAGCGTGTGAAGAGCGCTT<br>CTGCAGTTCATGAGAT |
| Cytokinin   | AT1G17440 | CKH1  | TCAGCAGTCGAAGAGCGCGG<br>AACCGATTCCCTCATC  | TTAGCGTGTGAAGAGCGTAT<br>CGTGTCATGTGTTGTA |
| Cytokinin   | AT4G11140 | CRF1  | TCAGCAGTCGAAGAGCGAGA<br>CAGAGAAGAAAGTTTC  | TTAGCGTGTGAAGAGCAACA<br>GTTAAGACAGGATCCG |
| Cytokinin   | AT2G46310 | CRF5  | TCAGCAGTCGAAGAGCAAAA<br>GCCGAGTGAGAAAATC  | TTAGCGTGTGAAGAGCCTTA<br>TCCAACAAATGATCTT |
| Cytokinin   | AT3G61630 | CRF6  | TCAGCAGTCGAAGAGCGAGA<br>GACGAACGAGACGAGT  | TTAGCGTGTGAAGAGCATCG<br>AAAGAGTGATGATGAT |
| Ethylene    | AT5G03730 | CTR1  | TCAGCAGTCGAAGAGCGAAA<br>TGCCCGGTAGAAGATC  | TTAGCGTGTGAAGAGCCAAA<br>TCCGAGCGGTTGGGCG |
| Ethylene    | AT1G66340 | ETR1  | TCAGCAGTCGAAGAGCGAAG<br>TCTGCAATTGTATTGA  | TTAGCGTGTGAAGAGCCATG<br>CCCTCGTACAGTACCC |
| Ethylene    | AT3G20770 | EIN3  | TCAGCAGTCGAAGAGCATGT<br>TTAATGAGATGGGAAT  | TTAGCGTGTGAAGAGCGAAC<br>CATATGGATACATCTT |

|               |           |       |                                           |                                             |
|---------------|-----------|-------|-------------------------------------------|---------------------------------------------|
| Ethylene      | AT2G27050 | EIL1  | TCAGCAGTCGAAGAGCATGA<br>TGTTTAACGAGATGGG  | TTAGCGTGTGAAGAGCGAAC<br>CATATTGATACATCTT    |
| Ethylene      | AT3G23240 | ERF1  | TCAGCAGTCGAAGAGCGATC<br>CATTTTTAATTCAGTC  | TTAGCGTGTGAAGAGCCCAA<br>GTCCCACTATTTTCAG    |
| Ethylene      | AT2G25490 | EBF1  | TCAGCAGTCGAAGAGCTCTC<br>AGATCTTTAGTTTTGC  | TTAGCGTGTGAAGAGCGGAG<br>AGGATGTCACATTTGT    |
| Strigolactone | AT2G42620 | MAX2  | TCAGCAGTCGAAGAGCGCTT<br>CCACTACTCTCTCCG   | TTAGCGTGTGAAGAGCGTCA<br>ATGATGTTGCGGCTGT    |
| Auxin         | AT3G26810 | AFB2  | TCAGCAGTCGAAGAGCAATT<br>ATTTCCCAGATGAAG   | TTAGCGTGTGAAGAGCGAGA<br>ATCCACACAAATGGCG    |
| Auxin         | AT1G12820 | AFB3  | TCAGCAGTCGAAGAGCAATT<br>ATTTCCCAGACGAGG   | TTAGCGTGTGAAGAGCAAGA<br>ATCCTAACATATGGTG    |
| Auxin         | AT4G24390 | AFB4  | TCAGCAGTCGAAGAGCACAG<br>AGAAGATAGCTCAGC   | TTAGCGTGTGAAGAGCTAAA<br>ATTGTTACAACTTTGGAGC |
| Auxin         | AT2G33860 | ARF3  | TCAGCAGTCGAAGAGCGGTG<br>GTTTAATCGATCTGAAC | TTAGCGTGTGAAGAGCGAGA<br>GCAATGTCTAGCAAC     |
| Auxin         | AT5G60450 | ARF4  | TCAGCAGTCGAAGAGCGAAT<br>TTGACTTGAATACTGAG | TTAGCGTGTGAAGAGCAACC<br>CTAGTGATTGTAGGAG    |
| Auxin         | AT5G37020 | ARF8  | TCAGCAGTCGAAGAGCAAGC<br>TGCAACATCTGGATTG  | TTAGCGTGTGAAGAGCGAGA<br>TGGGTCGGGTTTTGCG    |
| Auxin         | AT2G28350 | ARF10 | TCAGCAGTCGAAGAGCGAGC<br>AAGAGAAAAGCTTGG   | TTAGCGTGTGAAGAGCAGCG<br>AAGATGCTGAGCGGAC    |
| Auxin         | AT4G30080 | ARF16 | TCAGCAGTCGAAGAGCATAA<br>ATGTGATGAATCCAAT  | TTAGCGTGTGAAGAGCTACT<br>ACAACGCTCTCACTTC    |
| Auxin         | AT1G77850 | ARF17 | TCAGCAGTCGAAGAGCTCAC<br>CGCCGTCGGCAACCGC  | TTAGCGTGTGAAGAGCACCT<br>TGGGAGCTAGAACCTG    |
| Auxin         | AT3G61830 | ARF18 | TCAGCAGTCGAAGAGCGCGA<br>GTGTTGAAGGTGATGA  | TTAGCGTGTGAAGAGCCCC<br>CTACTACGATTTTCG      |
| Auxin         | AT1G05180 | AXR1  | TCAGCAGTCGAAGAGCCAAG<br>CAGTAAAAAGATCCAG  | TTAGCGTGTGAAGAGCCAAT<br>TTCAATAACTGAGAC     |
| Auxin         | AT1G54990 | AXR4  | TCAGCAGTCGAAGAGCGCGA<br>TTATCACAGAAGAAG   | TTAGCGTGTGAAGAGCAGTA<br>GTAGTCCATTCTCAC     |
| Auxin         | AT3G23030 | IAA2  | TCAGCAGTCGAAGAGCGCGT<br>ACGAGAAAGTCAACGAG | TTAGCGTGTGAAGAGCTAAG<br>GAAGAGTCTAGAGCAG    |
| Auxin         | AT1G04240 | IAA3  | TCAGCAGTCGAAGAGCGATG<br>AGTTTGTTAACCTCAAG | TTAGCGTGTGAAGAGCTACA<br>CCACAGCCTAAACCTTTG  |
| Auxin         | AT1G15580 | IAA5  | TCAGCAGTCGAAGAGCGCGA<br>ATGAGAGTAATAATC   | TTAGCGTGTGAAGAGCTCCT<br>CTGTTACATGATCTC     |
| Auxin         | AT3G23050 | IAA7  | TCAGCAGTCGAAGAGCATCG<br>GCCAACTTATGAACCTC | TTAGCGTGTGAAGAGCAGAT<br>CTGTTCTTGCAGTAC     |
| Auxin         | AT1G04100 | IAA10 | TCAGCAGTCGAAGAGCAATG<br>GTTTGCAAGAAGTTTG  | TTAGCGTGTGAAGAGCCTTA<br>CCTACTCCAGCTCCAATTG |
| Auxin         | AT1G04550 | IAA12 | TCAGCAGTCGAAGAGCCGTG<br>GTGTGTCAGAATTGGA  | TTAGCGTGTGAAGAGCAACA<br>GGGTTGTTTCTTTGTC    |
| Auxin         | AT2G33310 | IAA13 | TCAGCAGTCGAAGAGCATT<br>CTGAACTTGAGATGGG   | TTAGCGTGTGAAGAGCAACC<br>GGCTGCTTTCGCTGTC    |
| Auxin         | AT3G04730 | IAA16 | TCAGCAGTCGAAGAGCATT<br>ATTTTGAGGCCACGGAG  | TTAGCGTGTGAAGAGCACTT<br>CTGTTCTTGCACCTTTC   |

|       |                |             |                                            |                                           |
|-------|----------------|-------------|--------------------------------------------|-------------------------------------------|
| Auxin | AT1G04250      | IAA17       | TCAGCAGTCGAAGAGCATGG<br>GCAGTGTCGAGCTGAATC | TTAGCGTGTGAAGAGCAGCT<br>CTGCTCTTGCACTTCTC |
| Auxin | AT3G15540      | IAA19       | TCAGCAGTCGAAGAGCGAGA<br>AGGAAGGACTCGGGCTTG | TTAGCGTGTGAAGAGCCTCG<br>TCTACTCCTCTAGGCTG |
| Auxin | AT2G46990      | IAA20       | TCAGCAGTCGAAGAGCGGAA<br>GAGGGAGAAGTTCATC   | TTAGCGTGTGAAGAGCGTAG<br>TGGTAATTAGCTCTTG  |
| Auxin | AT3G17600      | IAA31       | TCAGCAGTCGAAGAGCGAGG<br>TCTCTAACTCTTGTTTC  | TTAGCGTGTGAAGAGCATAC<br>CTCTCCGGTCTCGTG   |
| Auxin | AT2G01200      | IAA32       | TCAGCAGTCGAAGAGCGACC<br>CAAACACACCTGCAGAC  | TTAGCGTGTGAAGAGCAAAG<br>GGAAGAAGAGCATCG   |
| Auxin | AT3G62980      | TIR1        | TCAGCAGTCGAAGAGCCAGA<br>AGCGAATAGCCTTGTC   | TTAGCGTGTGAAGAGCTAAT<br>CCGTTAGTAGTAATG   |
| Auxin | AT1G80490      | TPR1        | TCAGCAGTCGAAGAGCTCTT<br>CTCTGAGCAG         | TTAGCGTGTGAAGAGCTCTC<br>TGAGGCTGGTCAGAGG  |
| Auxin | AT3G16830      | TPR2        | TCAGCAGTCGAAGAGCTCGT<br>CTTTGAGCAGAGAGTTAG | TTAGCGTGTGAAGAGCCCTT<br>TGAATCTGATCCGAAC  |
|       |                |             |                                            |                                           |
|       |                |             |                                            |                                           |
|       | <b>Gene ID</b> | <b>Gene</b> | <b>Forward Primer (5'-3')</b>              | <b>Rerverse Primer (5'-3')</b>            |
|       | AT5G24780      | VPS1        | GTTTGGATCTTTGACCTAGA<br>CGA                | CTCTAACCACGACCAGTACG<br>C                 |
|       | AT5G24770      | VPS2        | CCTAAAGAACGACACCGTCA                       | TCGGTCTTCTCTGTTCCGTA                      |
