# Supplementary material for: A point‐to‐point protein–protein interaction assay reveals the signaling interplays among plant hormones and environmental cues
Source: PubMed Central journal article supplement — Plant Direct. 2020 May 25;4(5):e00228. doi: 10.1002/pld3.228 (PMC7247280; doi:10.1002/pld3.228), 2020-05-25
Supplement: PLD3-4-e00228-s003.pdf [file PLD3-4-e00228-s003.pdf]

| <b>Cues</b>   | <b>AGI name TAIR</b> | <b>Name</b> | <b>Tested as a hybrid fusion with Gal4</b> |
|---------------|----------------------|-------------|--------------------------------------------|
| Light&clock   | AT1G04400            | CRY2        | BD                                         |
| Light&clock   | AT1G09530            | PIF3        | BD                                         |
| Light&clock   | AT1G09570            | PHYA        | BD                                         |
| Light&clock   | AT1G22770            | GI          | BD                                         |
| Light&clock   | AT2G20180            | PIL5        | BD                                         |
| Light&clock   | AT2G25930            | ELF3        | BD                                         |
| Light&clock   | AT2G40080            | ELF4        | BD                                         |
| Light&clock   | AT2G43010            | PIF4        | BD                                         |
| Light&clock   | AT2G46830            | CCA1        | BD                                         |
| Light&clock   | AT3G09150            | HY2         | BD                                         |
| Light&clock   | AT3G45780            | PHOT1       | BD                                         |
| Light&clock   | AT3G47500            | CDF3        | BD                                         |
| Light&clock   | AT3G59060            | PIL6        | BD                                         |
| Light&clock   | AT3G62090            | PIL2        | BD                                         |
| Light&clock   | AT4G08920            | CRY1        | BD                                         |
| Light&clock   | AT4G17640            | CKB2        | BD                                         |
| Light&clock   | AT4G34530            | CIB1        | BD                                         |
| Light&clock   | AT5G20570            | RBX1        | BD                                         |
| Light&clock   | AT5G39660            | CDF2        | BD                                         |
| Light&clock   | AT5G57660            | COL5        | BD                                         |
| Light&clock   | AT5G61380            | TOC1        | BD                                         |
| Light&clock   | AT5G62430            | CDF1        | BD                                         |
| Light&clock   | AT5G67380            | CKA1        | BD                                         |
| Light&clock   | AT3G46640            | LUX         | BD                                         |
| Light&clock   | AT3G13670            | PPK1        | BD                                         |
| Light&clock   | AT5G18190            | PPK2        | BD                                         |
| Light&clock   | AT3G03940            | PPK3        | BD                                         |
| Light&clock   | AT2G25760            | PPK4        | BD                                         |
| Light&clock   | AT3G44450            | BIC1        | BD                                         |
| Abscisic acid | AT2G26040            | PYL2        | AD                                         |
| Abscisic acid | AT1G73000            | PYL3        | AD                                         |
| Abscisic acid | AT2G40330            | PYL6        | AD                                         |
| Abscisic acid | AT5G45860            | PYL11       | AD                                         |
| Abscisic acid | AT5G59220            | HAI1        | AD                                         |
| Abscisic acid | AT2G29380            | HAI3        | AD                                         |
| Abscisic acid | AT1G49720            | ABF1        | AD                                         |
| Abscisic acid | AT1G45249            | ABF2        | AD                                         |
| Abscisic acid | AT4G34000            | ABF3        | AD                                         |
| Abscisic acid | AT1G17550            | HAB2        | AD                                         |
| Abscisic acid | AT4G17870            | PYR1        | AD                                         |
| Abscisic acid | AT5G46790            | PYL1        | AD                                         |
| Abscisic acid | AT2G38310            | PYL4        | AD                                         |
| Abscisic acid | AT5G05440            | PYL5        | AD                                         |
| Abscisic acid | AT4G01026            | PYL7        | AD                                         |
| Abscisic acid | AT1G01360            | PYL9        | AD                                         |
| Abscisic acid | AT4G26080            | ABI1        | AD                                         |
| Abscisic acid | AT5G57050            | ABI2        | AD                                         |

|                 |           |         |    |
|-----------------|-----------|---------|----|
| Abscisic acid   | AT1G72770 | HAB1    | AD |
| Abscisic acid   | AT3G11410 | AHG3    | AD |
| Abscisic acid   | AT4G09570 | CPK4    | AD |
| Abscisic acid   | AT1G35670 | CPK11   | AD |
| Abscisic acid   | AT3G56850 | AREB3   | AD |
| Abscisic acid   | AT3G50500 | SNRK2.2 | AD |
| Abscisic acid   | AT5G66880 | SNRK2.3 | AD |
| Abscisic acid   | AT1G10940 | SNRK2.4 | AD |
| Abscisic acid   | AT4G33950 | SNRK2.6 | AD |
| Abscisic acid   | AT1G12480 | SLAC1   | AD |
| Abscisic acid   | AT3G57530 | CPK32   | AD |
| Salicylic acid  | AT1G05560 | UGT1    | AD |
| Salicylic acid  | AT1G21270 | WAK2    | AD |
| Salicylic acid  | AT2G43820 | SAGT1   | AD |
| Salicylic acid  | AT3G52430 | PAD4    | AD |
| Salicylic acid  | AT1G64280 | NPR1    | AD |
| Salicylic acid  | AT5G06950 | TGA2    | AD |
| Salicylic acid  | AT1G22070 | TGA3    | AD |
| Salicylic acid  | AT5G06960 | TGA5    | AD |
| Jasmonate       | AT4G28910 | NINJA   | AD |
| Jasmonate       | AT1G32640 | MYC2    | AD |
| Jasmonate       | AT5G46760 | MYC3    | AD |
| Jasmonate       | AT4G17880 | MYC4    | AD |
| Jasmonate       | AT1G19180 | JAZ1    | BD |
| Jasmonate       | AT1G74950 | JAZ2    | BD |
| Jasmonate       | AT3G17860 | JAZ3    | BD |
| Jasmonate       | AT1G48500 | JAZ4    | BD |
| Jasmonate       | AT1G17380 | JAZ5    | BD |
| Jasmonate       | AT1G72450 | JAZ6    | BD |
| Jasmonate       | AT2G34600 | JAZ7    | BD |
| Jasmonate       | AT1G30135 | JAZ8    | BD |
| Jasmonate       | AT1G70700 | JAZ9    | BD |
| Jasmonate       | AT5G13220 | JAZ10   | BD |
| Jasmonate       | AT3G43440 | JAZ11   | BD |
| Jasmonate       | AT5G20900 | JAZ12   | BD |
| Brassinosteroid | AT1G18400 | BEE1    | AD |
| Brassinosteroid | AT2G45400 | BEN1    | AD |
| Brassinosteroid | AT4G15400 | BIA1    | AD |
| Brassinosteroid | AT2G30980 | BIL1    | AD |
| Brassinosteroid | AT1G06390 | BIL2    | AD |
| Brassinosteroid | AT4G18710 | BIN2    | AD |
| Brassinosteroid | AT3G13380 | BRL3    | AD |
| Brassinosteroid | AT1G75080 | BZR1    | AD |
| Brassinosteroid | AT4G33430 | BAK1    | AD |
| Gibberellin     | AT3G05120 | GID1A   | AD |
| Gibberellin     | AT3G63010 | GID1B   | AD |
| Gibberellin     | AT5G27320 | GID1C   | AD |
| Gibberellin     | AT1G14920 | GAI     | AD |

|               |           |       |    |
|---------------|-----------|-------|----|
| Gibberellin   | AT1G66350 | RGL1  | AD |
| Gibberellin   | AT3G03450 | RGL2  | AD |
| Gibberellin   | AT5G17490 | RGL3  | AD |
| Gibberellin   | AT4G24210 | SLY1  | AD |
| Gibberellin   | AT5G48170 | SLY2  | AD |
| Cytokinin     | AT3G21510 | AHP1  | AD |
| Cytokinin     | AT3G29350 | AHP2  | AD |
| Cytokinin     | AT5G39340 | AHP3  | AD |
| Cytokinin     | AT3G16360 | AHP4  | AD |
| Cytokinin     | AT1G03430 | AHP5  | AD |
| Cytokinin     | AT1G80100 | AHP6  | AD |
| Cytokinin     | AT3G16857 | ARR1  | AD |
| Cytokinin     | AT4G16110 | ARR2  | AD |
| Cytokinin     | AT1G59940 | ARR3  | AD |
| Cytokinin     | AT1G10470 | ARR4  | AD |
| Cytokinin     | AT3G48100 | ARR5  | AD |
| Cytokinin     | AT5G62920 | ARR6  | AD |
| Cytokinin     | AT2G41310 | ARR8  | AD |
| Cytokinin     | AT1G74890 | ARR15 | AD |
| Cytokinin     | AT2G40670 | ARR16 | AD |
| Cytokinin     | AT1G17440 | CKH1  | AD |
| Cytokinin     | AT4G11140 | CRF1  | AD |
| Cytokinin     | AT2G46310 | CRF5  | AD |
| Cytokinin     | AT3G61630 | CRF6  | AD |
| Ethylene      | AT5G03730 | CTR1  | AD |
| Ethylene      | AT1G66340 | ETR1  | AD |
| Ethylene      | AT3G20770 | EIN3  | AD |
| Ethylene      | AT2G27050 | EIL1  | AD |
| Ethylene      | AT3G23240 | ERF1  | AD |
| Ethylene      | AT2G25490 | EBF1  | AD |
| Strigolactone | AT2G42620 | MAX2  | AD |
| Auxin         | AT3G26810 | AFB2  | AD |
| Auxin         | AT1G12820 | AFB3  | AD |
| Auxin         | AT4G24390 | AFB4  | AD |
| Auxin         | AT2G33860 | ARF3  | AD |
| Auxin         | AT5G60450 | ARF4  | AD |
| Auxin         | AT5G37020 | ARF8  | AD |
| Auxin         | AT2G28350 | ARF10 | AD |
| Auxin         | AT4G30080 | ARF16 | AD |
| Auxin         | AT1G77850 | ARF17 | AD |
| Auxin         | AT3G61830 | ARF18 | AD |
| Auxin         | AT1G05180 | AXR1  | AD |
| Auxin         | AT1G54990 | AXR4  | AD |
| Auxin         | AT3G23030 | IAA2  | AD |
| Auxin         | AT1G04240 | IAA3  | AD |
| Auxin         | AT1G15580 | IAA5  | AD |
| Auxin         | AT3G23050 | IAA7  | AD |
| Auxin         | AT1G04100 | IAA10 | AD |

|       |           |       |    |
|-------|-----------|-------|----|
| Auxin | AT1G04550 | IAA12 | AD |
| Auxin | AT2G33310 | IAA13 | AD |
| Auxin | AT3G04730 | IAA16 | AD |
| Auxin | AT1G04250 | IAA17 | AD |
| Auxin | AT3G15540 | IAA19 | AD |
| Auxin | AT2G46990 | IAA20 | AD |
| Auxin | AT3G17600 | IAA31 | AD |
| Auxin | AT2G01200 | IAA32 | AD |
| Auxin | AT3G62980 | TIR1  | AD |
| Auxin | AT1G80490 | TPR1  | AD |
| Auxin | AT3G16830 | TPR2  | AD |
