# Supplementary material for: A point‐to‐point protein–protein interaction assay reveals the signaling interplays among plant hormones and environmental cues
Source: PubMed Central journal article supplement — Plant Direct. 2020 May 25;4(5):e00228. doi: 10.1002/pld3.228 (PMC7247280; doi:10.1002/pld3.228), 2020-05-25
Supplement: PLD3-4-e00228-s004.pdf [file PLD3-4-e00228-s004.pdf]

| BD         |      | AD         |         |
|------------|------|------------|---------|
| TAIR_LOCUS | GENE | TAIR_LOCUS | GENE    |
| AT2G25930  | ELF3 | AT4G28910  | NINJA   |
| AT2G25930  | ELF3 | AT3G16360  | AHP4    |
| AT2G25930  | ELF3 | AT1G03430  | AHP5    |
| AT2G25930  | ELF3 | AT5G62920  | ARR6    |
| AT2G25930  | ELF3 | AT4G11140  | CRF1    |
| AT2G25930  | ELF3 | AT5G03730  | CTR1    |
| AT2G25930  | ELF3 | AT2G27050  | EIL1    |
| AT2G25930  | ELF3 | AT3G23240  | ERF1    |
| AT2G25930  | ELF3 | AT2G25490  | EBF1    |
| AT2G25930  | ELF3 | AT3G26810  | AFB2    |
| AT2G25930  | ELF3 | AT4G30080  | ARF16   |
| AT2G25930  | ELF3 | AT1G54990  | AXR4    |
| AT2G25930  | ELF3 | AT1G04240  | IAA3    |
| AT2G25930  | ELF3 | AT3G04730  | IAA16   |
| AT2G40080  | ELF4 | AT4G33950  | SNRK2.6 |
| AT2G40080  | ELF4 | AT1G22070  | TGA3    |
| AT2G40080  | ELF4 | AT2G27050  | EIL1    |
| AT2G40080  | ELF4 | AT1G04240  | IAA3    |
| AT2G40080  | ELF4 | AT1G04550  | IAA12   |
| AT2G40080  | ELF4 | AT3G04730  | IAA16   |
| AT2G46830  | CCA1 | AT4G24210  | SLY1    |
| AT2G46830  | CCA1 | AT3G29350  | AHP2    |
| AT2G46830  | CCA1 | AT2G27050  | EIL1    |
| AT2G46830  | CCA1 | AT4G30080  | ARF16   |
| AT2G46830  | CCA1 | AT1G04240  | IAA3    |
| AT2G46830  | CCA1 | AT1G04550  | IAA12   |
| AT2G46830  | CCA1 | AT3G04730  | IAA16   |
| AT5G61380  | TOC1 | AT3G57530  | CPK32   |
| AT5G61380  | TOC1 | AT1G32640  | MYC2    |
| AT5G61380  | TOC1 | AT5G03730  | CTR1    |
| AT5G61380  | TOC1 | AT2G27050  | EIL1    |
| AT5G61380  | TOC1 | AT4G30080  | ARF16   |
| AT5G61380  | TOC1 | AT1G04240  | IAA3    |
| AT5G61380  | TOC1 | AT3G04730  | IAA16   |
| AT5G62430  | CDF1 | AT1G17550  | HAB2    |
| AT5G62430  | CDF1 | AT3G11410  | AHG3    |
| AT5G62430  | CDF1 | AT3G63010  | GID1B   |
| AT5G62430  | CDF1 | AT3G03450  | RGL2    |
| AT5G62430  | CDF1 | AT1G10470  | ARR4    |
| AT5G62430  | CDF1 | AT2G27050  | EIL1    |
| AT5G62430  | CDF1 | AT1G04240  | IAA3    |
| AT5G62430  | CDF1 | AT1G04550  | IAA12   |
| AT5G62430  | CDF1 | AT3G04730  | IAA16   |
| AT5G39660  | CDF2 | AT1G04240  | IAA3    |
| AT3G47500  | CDF3 | AT3G57530  | CPK32   |
| AT3G47500  | CDF3 | AT1G10470  | ARR4    |

|           |       |           |         |
|-----------|-------|-----------|---------|
| AT3G47500 | CDF3  | AT2G27050 | EIL1    |
| AT3G47500 | CDF3  | AT4G30080 | ARF16   |
| AT3G47500 | CDF3  | AT1G04240 | IAA3    |
| AT3G47500 | CDF3  | AT1G04550 | IAA12   |
| AT4G17640 | CKB2  | AT3G29350 | AHP2    |
| AT5G67380 | CKA1  | AT1G22070 | TGA3    |
| AT5G67380 | CKA1  | AT1G17440 | CKH1    |
| AT5G67380 | CKA1  | AT2G27050 | EIL1    |
| AT5G67380 | CKA1  | AT4G30080 | ARF16   |
| AT5G67380 | CKA1  | AT1G04240 | IAA3    |
| AT5G67380 | CKA1  | AT1G04550 | IAA12   |
| AT1G04400 | CRY2  | AT1G32640 | MYC2    |
| AT1G04400 | CRY2  | AT3G05120 | GID1A   |
| AT1G04400 | CRY2  | AT3G48100 | ARR5    |
| AT1G04400 | CRY2  | AT1G17440 | CKH1    |
| AT1G04400 | CRY2  | AT2G27050 | EIL1    |
| AT1G04400 | CRY2  | AT4G30080 | ARF16   |
| AT1G04400 | CRY2  | AT1G04240 | IAA3    |
| AT1G04400 | CRY2  | AT1G04550 | IAA12   |
| AT1G04400 | CRY2  | AT3G04730 | IAA16   |
| AT2G43010 | PIF4  | AT3G20770 | EIN3    |
| AT2G43010 | PIF4  | AT2G25490 | EBF1    |
| AT2G43010 | PIF4  | AT1G80490 | TPR1    |
| AT3G45780 | PHOT1 | AT1G32640 | MYC2    |
| AT3G45780 | PHOT1 | AT1G74890 | ARR15   |
| AT3G45780 | PHOT1 | AT3G26810 | AFB2    |
| AT3G45780 | PHOT1 | AT1G12820 | AFB3    |
| AT4G34530 | CIB1  | AT2G38310 | PYL4    |
| AT4G34530 | CIB1  | AT5G59220 | HAI1    |
| AT4G34530 | CIB1  | AT4G01026 | PYL7    |
| AT4G34530 | CIB1  | AT2G45400 | BEN1    |
| AT4G34530 | CIB1  | AT1G66350 | RGL1    |
| AT4G34530 | CIB1  | AT3G03450 | RGL2    |
| AT4G34530 | CIB1  | AT1G10470 | ARR4    |
| AT4G34530 | CIB1  | AT3G61630 | CRF6    |
| AT4G34530 | CIB1  | AT2G27050 | EIL1    |
| AT4G34530 | CIB1  | AT4G24390 | AFB4    |
| AT4G34530 | CIB1  | AT1G54990 | AXR4    |
| AT3G13670 | PPK1  | AT3G50500 | SNRK2.2 |
| AT3G13670 | PPK1  | AT4G33430 | BAK1    |
| AT3G13670 | PPK1  | AT3G05120 | GID1A   |
| AT3G13670 | PPK1  | AT3G63010 | GID1B   |
| AT3G13670 | PPK1  | AT1G66350 | RGL1    |
| AT3G13670 | PPK1  | AT4G24210 | SLY1    |
| AT3G13670 | PPK1  | AT1G17440 | CKH1    |
| AT3G13670 | PPK1  | AT5G37020 | ARF8    |
| AT3G13670 | PPK1  | AT1G04130 | TPR2    |
| AT5G18190 | PPK2  | AT2G41310 | ARR8    |

|           |         |           |       |
|-----------|---------|-----------|-------|
| AT5G18190 | PPK2    | AT2G27050 | EIL1  |
| AT5G18190 | PPK2    | AT4G30080 | ARF16 |
| AT5G18190 | PPK2    | AT1G04240 | IAA3  |
| AT5G18190 | PPK2    | AT1G04550 | IAA12 |
| AT5G18190 | PPK2    | AT3G04730 | IAA16 |
| AT1G73000 | PPK3    | AT4G34000 | ABF3  |
| AT1G73000 | PPK3    | AT4G09570 | CPK4  |
| AT1G73000 | PPK3    | AT1G21270 | WAK2  |
| AT1G73000 | PPK3    | AT4G33430 | BAK1  |
| AT1G73000 | PPK3    | AT5G17490 | RGL3  |
| AT1G73000 | PPK3    | AT4G24210 | SLY1  |
| AT1G73000 | PPK3    | AT4G30080 | ARF16 |
| AT1G73000 | PPK3    | AT1G04240 | IAA3  |
| AT1G73000 | PPK3    | AT1G04550 | IAA12 |
| AT1G73000 | PPK3    | AT1G04550 | IAA16 |
| AT2G25760 | PPK4    | AT5G46790 | PYL1  |
| AT2G25760 | PPK4    | AT4G34000 | ABF3  |
| AT2G25760 | PPK4    | AT3G57530 | CPK32 |
| AT2G25760 | PPK4    | AT4G33430 | BAK1  |
| AT2G25760 | PPK4    | AT5G62920 | ARR6  |
| AT2G25760 | PPK4    | AT2G40670 | ARR16 |
| AT2G25760 | PPK4    | AT4G11140 | CRF6  |
| AT2G25760 | PPK4    | AT5G03730 | CTR1  |
| AT2G25760 | PPK4    | AT2G27050 | EIL1. |
| AT2G25760 | PPK4    | AT4G30080 | ARF16 |
| AT2G25760 | PPK4    | AT1G04240 | IAA3  |
| AT2G25760 | PPK4    | AT3G23050 | IAA7  |
| AT2G25760 | PPK4    | AT1G04550 | IAA12 |
| AT2G25760 | PPK4    | AT1G04250 | IAA17 |
| AT3G44450 | BIC1    | AT3G05120 | GID1A |
| AT3G44450 | BIC1    | AT5G17490 | RGL3  |
| AT3G44450 | BIC1    | AT3G29350 | AHP2  |
| AT3G44450 | BIC1    | AT2G28350 | ARF10 |
| AT3G44450 | BIC1    | AT1G04240 | IAA3  |
| AT3G44450 | BIC1    | AT1G04550 | IAA16 |
| AT2G38310 | PYL4    | AT1G19180 | JAZ1  |
| AT2G38310 | PYL4    | AT1G70700 | JAZ9  |
| AT4G26080 | ABI1    | AT1G19180 | JAZ1  |
| AT4G01026 | PYL7    | AT1G19180 | JAZ1  |
| AT3G11410 | AHG3    | AT1G19180 | JAZ1  |
| AT3G11410 | AHG3    | AT1G70700 | JAZ9  |
| AT3G50500 | SNRK2.2 | AT1G19180 | JAZ1  |
| AT3G50500 | SNRK2.2 | AT1G70700 | JAZ9  |
| AT3G50500 | SNRK2.2 | AT3G43440 | JAZ11 |
| AT5G66880 | SNRK2.3 | AT1G19180 | JAZ1  |
| AT5G66880 | SNRK2.3 | AT1G70700 | JAZ9  |
| AT5G66880 | SNRK2.3 | AT5G13220 | JAZ10 |
